1       **THE EVOLUTIONARY HISTORY OF THE OREXIN/ALLATOTROPIN GPCR**  
2               **FAMILY: FROM PLACOZOA AND CNIDARIA TO VERTEBRATA**

3               **ALZUGARAY, María Eugenia<sup>a,b</sup>; BRUNO, María Cecilia<sup>a,b</sup>; VILLALOBOS**

4               **SAMBUCARO, María José<sup>a,b</sup>; RONDEROS, Jorge Rafael<sup>a</sup>**

5           a. Cátedra de Histología y Embriología Animal, Facultad de Ciencias Naturales y Museo,  
6           Universidad Nacional de La Plata (FCNyM-UNLP). La Plata, Argentina

7           b. Consejo Nacional de Investigaciones Científicas y Técnicas (CONICET). Argentina

8       **Corresponding author:** Jorge R. Ronderos

9       Cátedra Histología Embriología Animal (FCNyM-UNLP), Universidad Nacional de La  
10       Plata.

11       Calle 64 N°3 (1900) La Plata - Buenos Aires – ARGENTINA

12       Fax and Telephone Number: 54-11-42758100

13       E-mail: [jrondero@museo.fcnym.unlp.edu.ar](mailto:jrondero@museo.fcnym.unlp.edu.ar); [ronderos@isis.unlp.edu.ar](mailto:ronderos@isis.unlp.edu.ar)

14

15       **Running Title:** Evolutionary history of Allatotropin/Orexin receptors

16

17       **Keywords:** Allatotropin, Orexin, GPCR, Evolution, Phylogeny, Sauropsida, Testudines,  
18       Actinopterygii, Lepisosteiformes, Archosauria, Archelosauria.

19

20

## ABSTRACT

21 Cell-cell communication is a basic principle in all organisms, necessary to facilitate the  
22 coordination and integration between cell populations. These systems act by mean of  
23 chemical messengers. Peptides constitute a highly diversified group of intercellular  
24 messengers widely distributed in nature, and regulate a great number of physiological  
25 processes in Metazoa. Being crucial for life, it would seem that they have appeared in the  
26 ancestral group from which Metazoa evolved, and were highly conserved along the  
27 evolutionary process. Peptides act mainly through G-protein coupled receptors (GPCRs), a  
28 great family of transmembrane molecules. GPCRs are also widely distributed in nature being  
29 present not only in metazoan, but also in Choanoflagellata (unicellular eukariotes related with  
30 metazoans), and even in Fungi. Among GPCRs, the Allatotropin/Orexin (AT/Ox) family is  
31 particularly characterized by the presence of the **DRW** motif in the second intracellular loop  
32 (IC Loop 2), and seems to be present in Cnidaria, Placozoa and in Bilateria, suggesting that  
33 it also was present in the common ancestor of Metazoa. Looking for the evolutionary history  
34 of this GPCR family we searched in the GenBank for sequences corresponding to this family  
35 of receptors (i.e. seven transmembrane domain and the E/DRW motif at the second IC Loop  
36 2). Our results show that AT/Ox receptors were highly conserved along evolutionary history  
37 of Metazoa, and that they might be defined by the presence of the E/DRWYAI motif at the  
38 level of IC Loop 2. Molecular phylogenetic analyses performed by Maximum Likelihood  
39 method suggest that AT/Ox family of receptors reflects evolutionary relationships that agree  
40 with current understanding of phylogenetic relationships in Actinopterygii and Sauropsida,  
41 including also the largely discussed position of Testudines.

42

## 43 INTRODUCTION

44 Cell-cell communication is a basic principle in all organisms, necessary to facilitate the  
45 coordination and integration between cell populations, and with their environment. Indeed,  
46 integrative mechanisms as nervous and endocrine systems have appeared early along the  
47 evolutionary process and play a very important role, regulating many physiological processes in  
48 all animal phyla. As it is known, these systems act by mean of messengers which can be basically  
49 grouped as hormones and neuromodulators. Among these chemical messengers, peptides  
50 constitute a highly diversified group of molecules widely distributed in nature, and regulate a  
51 great number of physiological processes in most groups of Metazoa, from cardiac and visceral  
52 muscle activity, to more complex phenomena as sleep-wakefulness, and appetite.

53 Being this family of messengers crucial for life, it would seem that they have appeared in the  
54 ancestral group from which Metazoa evolved, and became highly conserved along the  
55 evolutionary process. Indeed, peptidic messengers are present in *Hydra sp.* and others members  
56 of the phylum Cnidaria [1-4], as well as in *Trichoplax adhaerens*, a member of the neuron-less  
57 animal phylum Placozoa [5-7], that also shares a common ancestor with Bilateria.

58 Peptides act mainly through G-protein coupled receptors (GPCRs), a complex and ubiquitous  
59 family of transmembrane molecules. GPCRs are widely distributed in Vertebrata, but also, this  
60 family of proteins, have been proved to be present in all metazoan, including Placozoa, Cnidaria,  
61 Ctenophora and Porifera, which share a common ancestor with Bilateria; also in Choanoflagellata  
62 (a group of unicellular eukariotes related with metazoans), and even in Fungi [1-3; 8-11].

63 GPCRs are characterized by the presence of seven transmembrane (TM) domains, an extracellular  
64 N-terminal and an intracellular C-terminal domains. The transmembrane domains are linked by  
65 three extracellular and three intracellular loops [for a review see 12, 13]. GPCRs are usually  
66 grouped in five major families, named *Rhodopsin*, *Frizzled*, *Glutamate*, *Adhesion* and *Secretin*  
67 [14]. Among these, the *Rhodopsin* family seems to be the most widely distributed in Metazoa and  
68 it is particularly characterized by the existence of a **E/DR** motif associated to the third

69 transmembrane domain (TM3) (i.e. IC Loop 2), which seems to be relevant for the transmission  
70 of the message, facilitating the activity of the associated G-proteins [13, 14].

71 A vast number of the *Rhodopsin* family of receptor presents, as a conserved feature, the **E/DRY/F**  
72 motif [14, 15]. In spite of that, a more limited number show the presence of a Tryptophan (W)  
73 instead that a Tyrosine (Y) residue (i.e. **E/DRW**). Among these, we found the receptors  
74 corresponding to the Allatotropin (AT) family of peptides [16].

75 AT is a neuropeptide originally isolated and characterized in insects on the basis of its ability to  
76 modulate the synthesis of Juvenile Hormones (JHs) in the gland corpora allata (CA) of the moth  
77 *Manduca sexta* (Lepidoptera: Insecta) [17]; and some other holometabolous species like the  
78 mosquito *Aedes aegypti* [18, 19]. Beyond the first biological function assigned, AT has proved to  
79 have multiple functions, including modulation of digestive enzymes secretion, and ion exchange  
80 regulation in the digestive system of Lepidoptera [20, 21]. As a pleiotropic peptide, AT has also  
81 shown to be involved in myoregulatory processes, stimulating foregut movements in Lepidoptera  
82 [22]; and of the hindgut and midgut of both Chagas' disease vectors *Triatoma infestans* and  
83 *Rhodnius prolixus* (Insecta: Hemiptera) [23, 24]. Furthermore, AT has proved to have  
84 cardioacceleratory functions synergizing the activity of serotonin in these species [24, 25]. In spite  
85 that AT was originally characterized as a neuropeptide (i.e. secreted by neurons at the central  
86 nervous system), it is also secreted by epithelial cells of the Malpighian tubules, and open-type  
87 cells at the level of the digestive system, acting in a paracrine and also endocrine way [25-28].

88 Looking for the evolutionary origin of allatoregulatory peptides, Alzugaray et al. [1, 2] have  
89 suggested that the AT/Ox and AST-C/somatostatin signaling systems are present in *Hydra sp.*, a  
90 fresh water member of the phylum Cnidaria, playing myoregulatory roles during feeding, and  
91 modulating cytosolic Ca<sup>2+</sup> levels [3]. Indeed, it was suggested that the allatotropic function of this  
92 peptides would constitute an insect synapomorphy, and that the ancestral function of these  
93 peptides could be myoregulatory [1, 29-31].

94 On the basis of a transcriptomic analysis performed in the CA/corpora cardiaca complex of the  
95 silkworm *Bombyx mori* the AT receptor (ATr) was identified [32]. Afterward, the receptor of AT  
96 in *M. sexta* was also characterized [33]. These authors confirmed that the receptor pertains to the  
97 *Rhodopsin* family of GPCRs, sharing a 48% of identity with the orexin receptor of vertebrates in  
98 the region comprised between the TM1 and TM7 domains [33]. Moreover ATr shares with orexin  
99 receptors the characteristic DRW motif [34].

100 Orexins (Ox), also named Hypocretins [35], originally identified in neurons located at the level  
101 of the hypothalamus in the rat, are two peptides sharing structural characteristics, derived from a  
102 same precursor by proteolytic processing [34, 35]. Initially related with physiological  
103 mechanisms regulating feeding behavior, the activity of these peptides was posteriorly associated  
104 with mechanisms regulating wakefulness and sleep [for a review see 36], and also with peripheral  
105 tissues activities. In fact, the presence of Ox and their receptors in the enteric nervous system, as  
106 well as at the level of the mucosa and smooth muscle of the digestive tract of mammals was also  
107 shown, suggesting that they also act as myoregulators [37, 38].

108 AT and Ox peptides are structurally different. Interestingly, bioinformatic search doesn't show  
109 the presence of Ox in protostomates as well as AT in Deuterostomata, being possibly that, beyond  
110 the similarity between both receptors, Ox has evolved only in Deuterostomata and AT in  
111 Protostomata [1, 29, 30]. In fact, due that homology-based searches are often not sensitive enough  
112 to detect precursors of small peptides [5] and the difficulties to look for orthologues at the level  
113 of peptides, homologies between signal systems some times are based on their receptors [1; 39].

114 Looking for the evolutionary history of these signaling systems, we decide to go deeper in the  
115 analysis of these families of GPCRs (i.e. AT and Ox receptors). Based on fully characterized  
116 receptors both in vertebrates as well as in insects, we looked at the GenBank for putative AT/Ox  
117 receptors in all metazoan phyla. We have found sequences that might be considered AT/Ox  
118 GPCRs in several phyla including, Placozoa, Cnidaria, Mollusca, and Brachiopoda. On the basis  
119 of multiple sequence alignment we found motifs that might be considered "signatures" of the  
120 AT/Ox family of GPCRs. Phylogenetic analysis suggested that these families of receptors would

121 be present in the ancestor of Metazoa, and that the system was highly conserved along  
122 evolutionary process. Moreover, a detailed maximum likelihood (ML) analysis of groups like  
123 Actinopterygii and Sauropsida, reflects phylogenetic trees that agree with current understanding  
124 of their phylogenetic relationships, including also the largely discussed evolutionary position of  
125 Testudines.

126 **1- MATERIAL AND METHODS**

127 **2.1 Data retrieval:** Sequences corresponding to Vertebrate and Insecta AT/Ox GPCRs were  
128 searched in protein database of the National Center for Biotechnology Information (NCBI) at  
129 <https://www.ncbi.nlm.nih.gov/pubmed>, and by protein BLAST  
130 ([https://blast.ncbi.nlm.nih.gov/Blast.cgi?PROGRAM=blastp&PAGE\\_TYPE=BlastSearch&](https://blast.ncbi.nlm.nih.gov/Blast.cgi?PROGRAM=blastp&PAGE_TYPE=BlastSearch&LINK_LOC=blasthome)  
131 [LINK\\_LOC=blasthome](https://blast.ncbi.nlm.nih.gov/Blast.cgi?PROGRAM=blastp&PAGE_TYPE=BlastSearch&LINK_LOC=blasthome)) on the basis of already annotated sequences in the Non-redundant  
132 protein sequences database. All the selected sequences were checked for the presence of the  
133 characteristic seven transmembrane domains using the TMHMM Server v. 2.0  
134 (<http://www.cbs.dtu.dk/services/TMHMM/>). The presence of the **E/DRW** domain at the IC  
135 Loop 2 associated to TM3 was also verified. The sequences were then aligned using the  
136 Clustal Omega algorithm for multiple sequence alignment  
137 (<http://www.ebi.ac.uk/Tools/msa/clustalo/>) and further analyzed by the JalView 2.7 [40].  
138 Only those sequences presenting the seven TMs and the **E/DRW** domains, were included.

139 **2.2 Sequence analysis and alignment:** Based on the alignment of the full set of sequences a  
140 search for motifs that might be considered as signatures in the AT/Ox family was performed.  
141 Once established at least one probable signature a search in different phyla including Bilateria  
142 and non-bilateria groups as Cnidaria y Placozoa were done. Each sequence were analyzed  
143 looking for both, the presence of the seven transmembrane domain pattern and the presence  
144 of the **E/DRW** motif. The phyla in which probable GPCRs associated to the AT/Ox family  
145 were found are:

146 Placozoa, Cnidaria, Arthropoda, Mollusca, Annelida, Brachiopoda and Chordata (see  
147 Supporting Information File 1).

148 **2.3 Phylogenetic Analysis:** Finally, the analysis of evolutionary relationships between  
149 sequences, except for the one corresponding to Fig. 1 (Neighbor-Joining), was performed  
150 using the ML method based on the Poisson correction model, including a 1000 replicates  
151 bootstrap analysis, with a 50% cut-off for condensed tree by the use of Mega 6.06 software

152 [41]. The trees were then edited by the use of FigTree software  
153 (<http://tree.bio.ed.ac.uk/software/figtree/>).

154 The basic evolutionary relationships between groups are referred to *Tree of Life web Project*  
155 (<http://tolweb.org/tree/>) [42].

156 **2.4 Search for signatures:** Once the alignments were performed, we look manually for conserved  
157 motifs in different groups. The putative signatures were then blasted  
158 (<https://blast.ncbi.nlm.nih.gov/Blast.cgi>). Only those sequences presenting motifs covering the  
159 total length of the query blasted, showing %100 of identity were selected as putative signatures.



161 **RESULTS:**

162 **3.1- The Allatotropin/Orexin receptors ancestral signature:** As it is described above, GPCRs  
163 are characterized by the presence of the **E/DR** motif associated to the TM3 (i.e. IC Loop 2). Based  
164 on fully characterized AT and Ox receptors we looked in the GenBank for sequences in all animal  
165 phyla. After the analysis of 392 complete sequences, including N-terminal, C-terminal and the  
166 presence of 7 TM domains, we found that the motif **E/DRWYI** in the IC Loop 2 can be tracked  
167 from Chordata and Arthropoda, to Cnidaria and Placozoa. The most frequent motif found is  
168 **DRWYAI**, being present in 374 sequences, including the ancestral species *Trichoplax adhaerens*  
169 (Placozoa) (Table 1; Supporting Information File 1). The analysis of the rest of the sequences  
170 (eighteen), shows that seven of them exhibit only one conservative change, presenting **ERWYAI**  
171 corresponding to sequences of phyla pertaining to Lophotrochozoa (i.e. Mollusca, Brachiopoda  
172 and Annelida). The comparison of the codons codifying for the aspartic acid (D) and glutamic  
173 acid (E), shows that a point mutation at the third position of the codon would be responsible of  
174 this conservative change. A particular situation is presented in *H. vulgaris* (Cnidaria: Hydrozoa)  
175 in which the Tyrosine (Y) residue is substituted by asparagine (N), being the only sequence  
176 analyzed showing this conformation (i.e. ERWNAI). A point mutation at the first position of the  
177 codon should be responsible, and it has previously proposed as a sequence artifact [3].

178 **3.2- Predicted sequences and general relationships between the animal phyla:** As a result of  
179 a multiple sequence alignment, it also seems clear that at least two region of the AT/Ox receptor  
180 were highly conserved. One comprising the third transmembrane domain and its associated  
181 intracellular loop, and the second one comprising the TM7 (Fig. 1).

182 As a first approach to understand the relationships between the total sequences analyzed, a  
183 Neighbor-Joining analysis were performed (Fig. 2). The analysis shows that, as might be  
184 predicted, Placozoa (two sequences) and Cnidaria (three sequences pertaining to two different  
185 species of Anthozoa), clusters together sharing a common ancestor. Interestingly, the only

186 sequence fitting the characteristics of the AT/Ox family of GPCR in *Hydra vulgaris* (Cnidaria:  
187 Hydrozoa) is clustered alone as the sister group of Bilateria (Fig. 2).

188 Despite of several genomes of the phylum Nematoda are fully sequenced, none of the GPCR  
189 sequences found in the GenBank showed the **DRWY** motif, suggesting that the AT/Ox system is  
190 not present in this phylum. Similar situation was found for the other two groups of Metazoa with  
191 uncertain positions as Porifera and Ctenophora.

192 Mammals is the only group of organisms in which the existence of two different kind of receptors  
193 was proved (i.e. Type 1 and Type 2), suggesting that the presence of these two receptors  
194 constitutes a synapomorphy of this group. Interestingly, *Lepisosteus oculatus*, pertaining to the  
195 group of Lepisosteiformes (with only six extant species), representing together with Halecostomi,  
196 the extant groups of Neopterygii, also presents two sequences, sharing the same clade with Type  
197 1 receptor of Mammals. A more detailed analysis performed with ML methodology (see Fig. 3)  
198 also shows that these two sequences fit in the same clade, suggesting that the Type 1 Ox receptor  
199 appeared at least twice along the evolutionary history of Vertebrata (Fig. 2).

200 Finally, the three best represented groups (i.e. Arthropoda, and the Type 1 and 2 receptors of  
201 Vertebrata) can be recognized at least by a highly conserved motif at the level of the interphase  
202 between TM3 and the second intercellular loop (see Table 2 and Supporting Information File 1).

203 **3.3- Evolutionary history of orexin receptors in vertebrates:** As previously stated, there exist  
204 two types of receptors in Vertebrate (i.e. Type 1 and Type 2). A ML analysis clearly divides the  
205 groups analyzed in two clades based on the Type 1 and Type 2 characteristics (Fig. 3). As we  
206 described above, two out of three sequences predicted for *L. oculatus* are grouped in the same  
207 clade of Type 1 receptor of Mammals. The other one (accession number XP\_006638920) is  
208 grouped as a Type 2 receptor in the Actinopterygii clade (Fig. 3).

209 Regarding the Type 2 group, beyond that the Sarcopterygii are not grouped as a clade, showing  
210 Coelacanthimorpha, Amphibia, and the rest of tetrapoda a common ancestor with Actinopterygii

211 and Chondrichthyes, the more represented groups (i.e. Mammals, Actinopterygii and Sauropsida)  
212 are well defined as monophyletic groups (Fig. 3).

213 **3.4- Sauropsida:** As a first attempt to further understand the evolutionary history of the Ox  
214 receptor family, we decide to go deeper in the analysis of two groups of vertebrates well  
215 represented in our sample, as Sauropsida and Actinopterygii are, looking also for signatures  
216 motifs for every group analyzed. In fact, after a detailed analysis of the alignments for each group,  
217 we could find signature motifs, that once blasted in the GenBank, remitted specifically to most of  
218 the groups under study (Table 2).

219 A ML analysis of Sauropsida shows two well supported clades conformed, one of them by  
220 Lepidosauromorpha species, including those corresponding to Iguania and Serpentes,  
221 traditionally grouped in the order Squamata, and the second one, conformed by Archosauria and  
222 Testudines (Fig. 4). Regarding Squamata, sequences in the TM5 – IC Loop 3 seems to be  
223 characteristic, showing Serpentes and Iguania the motifs **APLCLMVLAYLQIFQKLWCQQ**  
224 and **MAPLCLMVLAYLQIFQKLWC** respectively (Table 2).

225 As would be expected, Archosauria presents a well-defined phylogenetic pattern involving  
226 Crocodylomorpha, with species representing the three extant groups (i.e. Gavialoidea;  
227 Alligatoroidea and Crocodyloidea) and Aves. The clade including Crocodylomorpha seems to be  
228 characterized for four different signature motifs; two located at the N-terminal domain, one  
229 corresponding to the C-terminal, and a third one in the IC Loop 3 (see Table 2). With respect to  
230 the birds, a sequence located in the interphase between N-terminal and TM1 would act as a  
231 signature (Table 2).

232 The clade corresponding to Aves, currently accepted as members of Coelurosauria (Dinosauria:  
233 Saurischia), shows the sequence **YEWALIAGYIVVFIVA** in the interphase N-terminal – TM1,  
234 fully conserved (Table 2). With respect to the phylogenetic relationships, the main groups are  
235 represented and grouped as well, including Paleognathae (*Tinamus guttatus*), and Neognathae  
236 which in fact form two well supported clades including Galloanserae and Neoaves (Fig. 4).

237 Moreover, the two groups of Galloanserae are represented by four species pertaining to different  
238 genus, grouped in the expected clades. In fact, *Anser cygnoides* and *Anas platythynchos*  
239 (*Anseriformes*), and *Coturnix japonica* and *Gallus gallus* (*Galliformes*) form two monophyletic  
240 groups. Regarding the Neoaves, only two currently recognized orders, *Psittaciformes* (represented  
241 by two species) and *Passeriformes*, are well defined (Fig. 4). *Passeriformes* represented by 16  
242 sequences, would be recognized by the sequence **TSNIDEAM** at the C-terminal domain.  
243 Moreover, two families in this group, *Pipridae* and *Paridae*, would also be identified by signatures  
244 at the level of the C-terminal domain (Table 2).

245 The last point to analyze is the position of turtles which phylogenetic position have been largely  
246 discussed. Our analyses shows the clade of *Testudines*, represented by species pertaining to three  
247 different families, as the sister group of *Archosauria* (*Crocodylomorpha* + *Aves*). Indeed, the  
248 sequence **ASTESRKSLTTQISNFDN** corresponding to the C-terminal domain, identify the  
249 *Archosauria-Testudines* clade (Fig. 4, Table 2).

250 **3.5- Actinopterygii:** Regarding to *Actinopterygii* (represented by species corresponding only to  
251 *Neopterygii*), the ML analyses of Type 2-like receptor, present them as a well-supported clade,  
252 sharing a common ancestor with *Condriichthyes* which are characterized by the presence of the  
253 **ADYDDEFI** motif at the level of the N-terminal (Fig. 5, Table 2). As expected, the sequence  
254 corresponding to Type 2 receptor of *Lepisosteiformes* appears as the sister group of *Halecostomi*  
255 (Fig. 5). With respect to *Halecostomi*, only sequences corresponding to *Teleostei* was found.  
256 *Amiiformes*, one of the extant group is not represented in our samples. *Teleostei*, the more  
257 diversified group, represented by numerous species that can be grouped in 11 different clades (see  
258 [tolweb.org](http://tolweb.org) for reference) is represented by 6, including *Osteoglossomorpha*, *Ostariophysii*,  
259 *Clupeomorpha*, *Salmoniformes*, *Esociformes* and *Acanthomorpha* (Fig. 5). Similarly to other  
260 studies, *Osteoglossomorpha* (*Scleropages formosus*) appears as the sister group of the clade that  
261 includes *Ostarioclupeomorpha* (*Ostariophysii* and *Clupeomorpha*) and *Euteleostei*  
262 (*Protacanthopterygii* and *Neoteleostei*).

263 The other two clades of Teleostei (i.e. Ostarioclupeomorpha and Euteleostei) share a common  
264 ancestor. The first one, involves one Clupeomorpha species appearing as the sister group of  
265 Otophysi, which is well represented by three out of four recognized orders (Characiformes,  
266 Siluriformes and Cypriniformes) (Fig. 5). Indeed, Characiformes and Siluriformes are grouped in  
267 a clade as expected by previous phylogenetic studies, being the sister group of Cypriniformes.  
268 Regarding Euteleostei, the two main clades appear as sister groups; Protacanthopterygii (which  
269 could be characterized by the presence of the **KFRAEFKA** motif in the C-terminal), including  
270 Esociformes (*Esox lucius*) and Salmoniformes. Salmoniformes are represented by three species  
271 of two different genus: *Salmo salar*, *Oncorhynchus mykiss* and *O. kisutch*. Moreover, the two  
272 species of the genus *Oncorhynchus* are recognized as a clade (Fig. 5). Regarding Salmoniformes,  
273 our analyses show the existence of 5 different motifs that might be considered as signatures (see  
274 Table 2).

275 With respect to Neoteleostei, a total of 28 sequences were analyzed, pertaining all of them to the  
276 clade of Percomorpha (Acanthopterygii), corresponding to: Pleuronectiformes (2),  
277 Gasterosteiformes (1), Synbranchiformes (1), Tetraodontiformes (1), Beloniformes (1),  
278 Cyprinodontiformes (10) and 12 species corresponding to the non-monophyletic traditional  
279 “Perciformes”. The members of two families traditionally considered as members of the order  
280 Perciformes, as Pomacentridae (represented by two species) and Cichlidae (five species), are well  
281 grouped as individual clades. Indeed, the clade of Cichlidae, currently considered as the Order  
282 Cichliformes [43] might be identified by three different motifs located at the N-terminal, C-  
283 terminal, and IC Loop 3 (Fig. 5, Table 2). Finally, other well represented group is  
284 Cyprinodontiformes, characterized by the presence of **DNLSRLSDQ** motif at the C-terminal  
285 domain, including 10 sequences corresponding to five different families, being Rivulidae (2) and  
286 Poeciliidae (5 species) those best represented. Interestingly both of them are grouped as individual  
287 clades (Fig. 5), being characterized by the **RTLRCSAQT** (Rivulidae) and **QRNWRTIQCS**  
288 motifs (Poeciliidae). Regarding Poeciliidae, two more motifs might be characteristics at the level  
289 of the N-terminal domain (Table 2).

290 **DISCUSSION:**

291 As it is known, GPCRs are widely distributed in nature, being associated with the regulation of a  
292 great number of physiological mechanisms. As they are engaged with critical processes it is not  
293 rare that they were conserved along the evolutionary processes, being appeared early in the  
294 evolution. Indeed, SWSI (short-wavelength sensitive opsin), another member of the GPCR family  
295 of proteins which is involved in light signal transduction, has proved to be a potential phylogenetic  
296 marker in Vertebrata, showing phylogenetic relationships congruent with the evolution of this  
297 group at both high and low taxonomic levels [44].

298 We have previously shown that GPCRs are present in a variety of Metazoa, including *T.*  
299 *adhaerens*, the multicellular organism pertaining to the neuron-less phylum, Placozoa [1].  
300 Moreover, previous studies in our laboratory suggest that in *Hydra sp.* GPCRs associated with  
301 regulatory peptides are present (Cnidaria: Hydrozoa) [1-3]. Indeed, these studies suggest the  
302 existence of Allatotropin/Orexin and Allatostatin-C/Somatostatin homologous systems that would  
303 act as myomodulators, controlling the movements associated with capture and digestion of the  
304 prey in *Hydra sp.* [1-3].

305 Regarding AT/Ox GPCRs, as we detailed above, they are characterized by the presence of a  
306 Tryptophan (W) instead of a Tyrosine (Y) associated to the E/DR motif in the IC Loop 2 [16].  
307 Our results show, that the AT/Ox family of GPCRs may be defined by the presence of the  
308 **E/DRWYAI** motif, present in 381 out of 392 sequences analyzed, covering most of the Metazoa  
309 phyla, and that might be considered as a signature of the family. Furthermore, despite we could  
310 not find any convincing sequence showing this characteristic motif nor in Ctenophora neither in  
311 Porifera, due to its presence in Placozoa, Cnidaria and Bilateria, it might be assumed that the  
312 AT/Ox family of GPCRs was present in the common ancestor of Metazoa. The lack of the AT/Ox  
313 family of GPCR in those phyla, might be a biological phenomenon, or perhaps an artifact. In fact,  
314 beyond the great quantity of information about genomic and transcriptomic sequencing, it may  
315 be assumed that it is still perfectible [45]. Indeed, the phylogenetic positions and the evolutionary

316 relationships between Ctenophora, Porifera and the rest of the metazoan groups is still  
317 controversial [8, 46]. Moreover, regarding GPCRs, it was already suggested that the Porifera  
318 Rhodopsin family has not orthologous relationship with the ones found in the rest of Metazoa  
319 [11].

320 Regarding Vertebrata two different groups were found. Interestingly, are not defined by their  
321 phylogenetic relationships, but by the kind of the protein constituting the receptor (Type 1 and  
322 Type 2 receptor). One of these groups (i.e. Type 2) is represented in all the groups including,  
323 Chondrichthyes, Actinopterygii, Sauropsida and Mammalia, and might be defined for the  
324 presence of the **CIAL/QDRWYAICHPL** motif. On the other hand, with the exception of  
325 Lepisosteiformes (Actinopterygii: Neopterygii), Type 1 receptor is exclusively expressed in  
326 Mammalia (defined by the **FIALDRWYAICHPL** motif). In fact, in Lepisosteiformes, three  
327 different sequences were found; two of them are grouped in all the analysis performed with the  
328 Type 1 receptor of mammals showing also the **FIALDRWYAICHPL** motif in the interphase  
329 between TM3 and the IC loop 2. Beyond these two sequences, a third one (grouped as Type 2  
330 receptor), shows a phylogenetic position according to the current assumption, as the sister group  
331 of Halecostomi. The existence of two kind of Ox receptors might be considered as a  
332 synapomorphy of Mammalia. The presence of the Type 1-like receptor in Lepisosteiformes would  
333 be suggesting that this receptor had appeared more than once along the evolution of Vertebrata.

334 As a way to further understand the evolutionary history of this family of receptors, we decided to  
335 go deeper in the analysis of Type 2-like receptor phylogenetic relationships in two groups of  
336 Vertebrata (Sauropsida and Actinopterygii). In both of them, our results show that the sequences  
337 phylogenetic relationships are mostly in agreement with current hypothesis about their phylogeny.  
338 As an example, a group of species of Neoteleostei (i.e. *Oreochromis niloticus*, *Maylandia zebra*,  
339 *Neolamprologus brichardi*, *Haplochromis burtoni* and *Pundamilia nyererei*), traditionally  
340 considered as the Cichlidae family pertaining to the order Perciformes (at present considered as  
341 polyphyletic), are still grouped as a clade, that in fact is now considered as the order Cichliformes  
342 [43]. Another interesting point is that related with the order Cyprinodontiformes. This group

343 represented by 10 species pertaining to five different families, are well defined as independent  
344 groups, being the two families represented by two or more species (i.e. Poeciliidae and Rivulidae)  
345 grouped as monophyletic groups sharing a common ancestor with the rest of the species of the  
346 order. Indeed, these two families might be recognized by signatures located at the N-terminal and  
347 IC Loop 3.

348 Other interesting subject is related with the phylogeny of Sauropsida and the evolutionary position  
349 of turtles (Testudines). The phylogenetic position of turtles was largely controversial, as they were  
350 traditionally considered as an order pertaining to the group of Anapsida (having no temporal  
351 fenestrae in their skull). Traditional studies based on paleontological and morphological  
352 characters positioned them as the only extant group of Anapsida being the sister group of Diapsida  
353 (a clade that includes Lepidosauromorpha, Archosauria as sister groups). Based on both  
354 paleontological and molecular phylogeny, the evolutionary relationships of Testudines was  
355 revisited, considering them as the sister group of Lepidosauromorpha, or as the sister group of  
356 Archosauria (Aves and Crocodylomorpha) [for a review see 47]. The finding of a stem-turtle from  
357 the middle Triassic finally positioned turtles as a member of Diapsida [48, 49]. In agreement with  
358 previous molecular studies [50-53], our results, based on sequences pertaining to three different  
359 families, place Testudines as the sister group of Archosauria, sharing the  
360 **ASTESRKSLTTQISNFDN** motif at the C-terminal domain. Indeed the existence of a new group  
361 including Testudines and Archosauria named Archelosauria was recently proposed [51].

362 Finally, our results show the existence of numerous motifs that might be considered as signatures  
363 for several of the groups analyzed, being hypothetically possible to test them both as  
364 phylogenetical markers at both higher and lower taxonomic levels.



366

## ACKNOWLEDGMENTS

367 This research was supported by funds provided by the National University of La Plata (N/813)  
368 and CONICET (PIP N° 112201-50100419). MEA and MJVS are researcher of CONICET  
369 (Argentina). The authors also wish to thanks to Dr. Cecilia Morgan for the critical reading  
370 of the manuscript and her valuable comments.

371

## 372 REFERENCES

373 [1] Alzugaray ME, Adami ML, Diambra AL, Hernández-Martínez S, Damborenea C,  
374 Noriega FG, et al. (2013). Allatotropin: An ancestral myotropic neuropeptide involved in  
375 feeding. PLoS One. 8: e77520.

376 [2] Alzugaray ME, Hernández-Martínez S, Ronderos JR (2016). Somatostatin signaling  
377 system as an ancestral mechanism: Myoregulatory activity of an Allatostatin-C peptide  
378 in *Hydra*. Peptides. 82: 67-75.

379 [3] Alzugaray ME, Ronderos JR (2018). Allatoregulatory-like systems and changes in  
380 cytosolic Ca<sup>2+</sup> modulate feeding behavior in *Hydra*. Gen Comp Endocrinol. 258:70-78.

381 [4] Grimmelikhuijzen CJP, Hauser F (2012). Mini-review: The evolution of neuropeptide  
382 signaling. Regul Pept. 177, S6-S9.

383 [5] Nikitin M (2015). Bioinformatic prediction of *Trichoplax adhaerens* regulatory  
384 peptides. Gen Comp Endocrinol. 212: 145-155.

385 [6] Schuchert P (1993). *Trichoplax adhaerens* (Phylum Placozoa) has cells that react with  
386 antibodies against the neuropeptide RFamine. Acta Zool. 74: 115-117.

387 [7] Smith CL, Varoqueaux F, Kittelmann M, Azzam RN, Cooper B, Winters CA, et al.  
388 (2014). Novel cell types, neurosecretory cells, and body plan of the early-diverging  
389 metazoan *Trichoplax adhaerens*. Current Biol. 24: 1565-1572.

390 [8] Jékely G, Paps J, Nielsen C (2015). The phylogenetic position of ctenophores and the  
391 origin(s) of nervous systems. EvoDevo. 6: 1.

- 392 [9] Johnson TA, Milan-Lobo L, Che T, Ferwerda M, Lambu E, McIntosh NL, et al.  
393 (2017). Identification of the first marine-derived opioid receptor “balanced” agonist with  
394 a signaling profile that resembles the endorphins. *ACS Chem Neurosci*. 8: 473-485.
- 395 [10] Krishnan A, Almén MS, Fredriksson R, Schiöth HB (2012). The origin of GPCRs:  
396 identification of mammalian like Rhodopsin, Adhesion, Glutamate and Frizzled GPCRs  
397 in Fungi. *PLoS ONE* 7: e29817.
- 398 [11] Krishnan A, Dnyansagar R, Almén MS, Williams MJ, Fredriksson R, Manoj N, et  
399 al. (2014). The GPCR repertoire in the demosponge *Amphimedon queenslandica*: Insights  
400 into the GPCR system at the early divergence of animals. *BMC Evol Biol*. 14: 1-16.
- 401 [12] Bockaert J, Pin JP (1999). Molecular tinkering of G protein-coupled receptors: an  
402 evolutionary success. *EMBO J*. 18: 1723-1729.
- 403 [13] Millar RP, Newton CL (2010). The year in G protein-coupled receptor research. *Mol*  
404 *Endocrinol*. 24: 261-274.
- 405 [14] Fredriksson R, Lagerström MA, Lundin L, Schiöth HB (2003). The G-protein-  
406 coupled receptors in the human genome form five main families. Phylogenetic analysis,  
407 paralogon groups, and fingerprints. *Mol Pharmacol*. 63: 1256-1272.
- 408 [15] McCorvy JD, Roth BL (2015). Structure and function of serotonin G protein-coupled  
409 receptors. *Pharmacol Ther*. 150: 129-142.
- 410 [16] Verlinden H, Gijbels M, Lismont E, Lenaerts C, Vanden Broek J, Marchal E (2015).  
411 The pleiotropic allatoregulatory neuropeptides and their receptors: A mini-review. *J*  
412 *Insect Physiol*. 80: 2-14.
- 413 [17] Kataoka H, Toschi A, Li JP, Carney RL, Schooley DA, Kramer SJ (1989).  
414 Identification of an allatotropin from adult *Manduca sexta*. *Science*. 243: 1481-1483.
- 415 [18] Hernández Martínez S, Mayoral JG, Li Y, Noriega FG (2007). Role of juvenile  
416 hormone and allatotropin on nutrient allocation, ovarian development and survivorship  
417 in mosquitoes. *J Insect Physiol*. 53: 230-234.

- 418 [19] Li Y, Unnithan GC, Veenstra JA, Feyereisen R, Noriega FG (2003). Stimulation of  
419 JH biosynthesis by the corpora allata of adult female *Aedes aegypti* in vitro: effect of  
420 farnesoic acid and *Aedes* allatotropin. *J Exp Biol.* 206: 1825-1832.
- 421 [20] Lee KY, Horodyski FM, Chamberlin ME (1998). Inhibition of midgut ion transport  
422 by allatotropin (Mas-At) and *Manduca* FRLFamides in the tobacco hornworm *Manduca*  
423 *sexta*. *J Exp Biol.* 201: 3067-3074.
- 424 [21] Lwalaba D, Hoffmann KH, Woodring J (2009). Control of the release of digestive  
425 enzymes in the larvae of the fall armyworm, *Spodoptera frugiperda*. *Arch Insect Biochem*  
426 *Physiol.* 73: 14-29.
- 427 [22] Duve H, Audsley N, Weaver RJ, Thorpe A (2000). Triple co-localisation of two  
428 types of allatostatin and an allatotropin in the frontal ganglion of the lepidopteran  
429 *Lacanobia oleracea* (Noctuidae): Innervation and action on the foregut. *Cell Tissue Res.*  
430 300: 153-163.
- 431 [23] Santini MS, Ronderos JR (2007). Allatotropin-like peptide released by Malpighian  
432 tubules induces hindgut activity associated to diuresis in the Chagas disease vector  
433 *Triatoma infestans* (Klug). *J Exp Biol.* 210: 1986-1991.
- 434 [24] Villalobos-Sambucaro MJ, Lorenzo-Figueiras AN, Riccillo FL, Diambra LA,  
435 Noriega FG, Ronderos JR (2015). Allatotropin modulates myostimulatory and  
436 cardioacceleratory activities in *Rhodnius prolixus* (Stal). *PLoS ONE.* 10: e0124131.
- 437 [25] Sterkel M, Riccillo FL, Ronderos JR (2010). Cardioacceleratory and myostimulatory  
438 activity of allatotropin in *Triatoma infestans* (Klög). *Comp Biochem Physiol A Mol*  
439 *Integr Physiol.* 155: 371-377.
- 440 [26] Santini MS, Ronderos JR (2009a). Allatotropin-like peptide in Malpighian tubules:  
441 Insect renal tubules as an autonomous endocrine organ. *Gen Comp Endocrinol.* 160: 243-  
442 249.
- 443 [27] Santini MS, Ronderos JR (2009b). Daily variation of an allatotropin-like peptide in  
444 the Chagas disease vector *Triatoma infestans* (Klug). *Biol Rhythm Res.* 40: 299-306.

- 445 [28] Riccillo FL, Ronderos JR (2010). Allatotropin expression during the development  
446 of the fourth instar larvae of the kissing-bug *Triatoma infestans* (Klüg). Tissue Cell. 42:  
447 355-359.
- 448 [29] Adami ML, Damborenea C, Ronderos JR (2011). Expression of a neuropeptide  
449 similar to allatotropin in free living Turbellaria (Platyhelminthes). Tissue Cell 43: 377-  
450 383.
- 451 [30] Adami ML, Damborenea C, Ronderos JR (2012). An allatotropin-like neuropeptide  
452 in *Mesostoma ehrenbergii* (Rhabdozoa, Platyhelminthes). Zoomorphology 131: 1-9.
- 453 [31] Elekonich MM, Horodyski FM (2003). Insect allatotropins belong to a family of  
454 structurally-related myoactive peptides present in several invertebrate phyla. Peptides.  
455 24:1623-1632.
- 456 [32] Yamanaka N, Yamamoto S, Žitňan D, Watanabe K, Kawada T, Satake H, et al.  
457 (2008). Neuropeptide receptor transcriptome reveals unidentified neuroendocrine  
458 pathways. PLoS ONE 3: e3048.
- 459 [33] Horodyski FM, Verlinden H, Filkin N, Vandersmissen HP, Fleury C, Reynolds SE,  
460 et al. (2011). Isolation and functional characterization of an allatotropin receptor from  
461 *Manduca sexta*. Insect Biochem Mol Biol. 41: 804-814.
- 462 [34] Sakurai T, Amemiya A, Ishii M, Matsuzaki I, Chemelli RM, Tanaka H, et al. (1998).  
463 Orexins and orexin receptors: a family of hypothalamic neuropeptides and G protein-  
464 coupled receptors that regulate feeding behavior. Cell. 92: 573-585.
- 465 [35] de Lecea L, Kilduff TS, Peyron C, Gao X, Foye PE, Danielson PE, et al. (1998). The  
466 hypocretins: hypothalamus-specific peptides with neuroexcitatory activity. Proc Natl  
467 Acad Sci. 95: 322-327.
- 468 [36] Kukkonen JP (2013). Physiology of the orexinergic/hypocretinergic system: a revisit  
469 in 2012. Am J Physiol Cell Physiol. 301: 2-32.
- 470 [37] Näslund E, Ehrström M, Ma J, Hellström PM, Kirchgessner AL (2002). Localization  
471 and effects of orexin on fasting motility in the rat duodenum. Am J Physiol Gastrointest  
472 Liver Physiol. 282: G470-G479.

- 473 [38] Squecco R, Garella R, Luciani G (2011). Muscular effects of orexin A on the mouse  
474 duodenum: mechanical and electrophysiological studies. *J Physiol.* 589: 5231-5246.
- 475 [39] Jékely G (2013). Global view of the evolution and diversity of metazoan  
476 neuropeptide signaling. *Proc Natl Acad Sci USA.* 110: 8702-8707.
- 477 [40] Waterhouse AM, Procter JB, Martin DMA, Clamp M, Barton GJ (2009). JalView  
478 version 2 – a multiple sequence alignment editor and analysis workbench.  
479 *Bioinformatics.* Doi:10.1093/bioinformatics/btp033.
- 480 [41] Tamura K, Stecher G, Peterson D, Filipiński A, Kumar S (2013). MEGA6: Molecular  
481 Evolutionary Genetics Analysis Version 6.0. *Mol Biol Evol.* 30: 2725-2729.
- 482 [42] Maddison DR, Schulz K, Maddison WP (2007). The tree of life web project. *Zootaxa*  
483 1668: 19-40.
- 484 [43] Betancur-R R, Wiley EO, Arratia G, Acero A, Bailly N, Miya M, et al. (2017).  
485 Phylogenetic classification of bony fishes. *BMC Evol Biol.* 17: 162.
- 486 [44] van Hazel I, Santini F, Müller J, Chang BSW (2006). Short-wavelength sensitive  
487 opsin (SWS1) as a new marker for vertebrate phylogenetics. *BMC Evol Biol.* 6: 97.
- 488 [45] Kerbl A, Conzelmann M, Jékely G, Worsaae K (2017). High diversity in  
489 neuropeptide immunoreactivity patterns among three closely related species of  
490 Dinophilidae (Annelida). *J Comp Neurol.* 525: 3596-3635.
- 491 [46] Dunn CW, Leys SP, Haddock HD (2015). The hidden biology of sponges and  
492 ctenophores. *Trends Ecol Evol.* 30: 282-291.
- 493 [47] Meyer A, Zardoya R (2003). Recent Advances in the (Molecular) Phylogeny of  
494 Vertebrates. *Annu Rev Ecol Evol Syst.* 34: 311-338.
- 495 [48] Schoch RR, Sues HD (2015). A middle triassic stem-turtle and the evolution of the  
496 turtle body plan. *Nature.* 523: 584-587.
- 497 [49] Schoch RR, Sues HD (2016). The diapsid origin of turtles. *Zoology.* 119: 159-161.
- 498 - [50] Chiari Y, Cahais V, Galtier N, Delsuc F (2012). Phylogenomic analyses support the  
499 position of turtles as the sister group of birds and crocodiles (Archosauria). *BMC Biol.*  
500 10: 65.

- 501 - [51] Crawford NG, Parham JF, Sellas AB, Faircloth BC, Glenn TC, Papenfuss TJ, et al.  
502 (2015). A phylogenomic analysis of turtles. *Molecular Phylogenetics and Evolution*. 83:  
503 250-257.
- 504 - [52] Field DJ, Gauthier JA, King BL, Pisani D, Lyson TR, Peterson KJ (2014). Toward  
505 consilience in reptile phylogeny: microRNAs support an archosaur, not a lepidosaur  
506 affinity for turtles. *Evol Dev*. 16: 189-196.
- 507 - [53] Kumazawa Y, Nishida M (1999). Complete mitochondrial DNA sequences of the  
508 green turtle and blue-tailed mole skink: statistical evidence for archosaurian affinity of  
509 turtles. *Mol Biol Evol*. 16: 784-792.
- 510

| Phylum      | Signature           |
|-------------|---------------------|
| Placozoa    | D/ <b>ERWYAI</b> /V |
| Cnidaria    | <b>ERWYAI</b> /V    |
| Brachiopoda | <b>ERWYAI</b>       |
| Annelida    | <b>ERWYAI</b>       |
| Mollusca    | <b>ERWYAI</b>       |
| Arthropoda  | <b>DRWYAI</b>       |
| Chordata    | <b>DRWYAI</b>       |

511 **Table 1.** Characteristic Allatotropin/Orexin signature located at the interphase between  
 512 transmembrane domain 3 (TM3) and the second intracellular loop (IC loop 2) distribution for  
 513 every phylum analyzed.

|                                            |               |                    |                          |
|--------------------------------------------|---------------|--------------------|--------------------------|
| Vertebrata                                 | Type 1        | TM3 – IC Loop 2    | FIALDRWYAICHPL           |
| Vertebrata                                 | Type 2        | TM3 – IC Loop 2    | CIAL/QDRWYAICHPL         |
| Arthropoda                                 |               | TM3-IC Loop 2      | FISI/L/VDRWYAIC          |
| Chondrichthyes                             |               | N - Terminal       | ADYDDEFI                 |
| Teleostei -<br>Coelacanthiformes           |               | TM2 – EC Loop 1    | CLPASLVVDITET            |
| Cyprinodontiformes                         | Poeciliidae   | N - Terminal       | YPAHGGNDTGSR             |
| Cyprinodontiformes                         | Poeciliidae   | N - Terminal       | WTDYLHPKEYEW             |
| Cyprinodontiformes                         | Poeciliidae   | IC Loop 3          | QRNWRTIQCS               |
| Cyprinodontiformes                         | Rivulidae     | IC Loop 3          | RTLRCSAQT                |
| Cyprinodontiformes                         |               | N - Terminal – TM1 | YLHPKEYEWVLIVAYI         |
| Cyprinodontiformes                         |               | C - Terminal       | DNLSRLSDQ                |
| Cichliformes                               |               | IC Loop 3          | IKCSAPTPGP               |
| Cichliformes                               |               | N - Terminal       | LSSGHLPNSTELHVHPTL       |
| Cichliformes                               |               | C – Terminal       | RRIRTRTRTDSRKSLSLSTQVHNV |
| Protacanthopterygii                        |               | C – Terminal       | KFRAEFKA                 |
| Protacanthopterygii                        | Salmoniformes | TM4                | SILLIWGVSC               |
| Protacanthopterygii                        | Salmoniformes | IC Loop 1          | KNHHMRTVTNCF             |
| Protacanthopterygii                        | Salmoniformes | IC Loop 1          | CEERWGADV                |
| Protacanthopterygii                        | Salmoniformes | IC Loop 3          | TSSVLQRKRT               |
| Protacanthopterygii                        | Salmoniformes | EC Loop 4          | FKYTNSRETVY              |
| Cypriniformes                              | Cyprinidae    | IC Loop 3          | QCSAHAVGS                |
| Osteoglossiformes -<br>Ostarioclupeomorpha |               | EC Loop 3 – TM7    | NRET/AVYAWFT             |
| Squamata                                   | Serpentes     | TM5 – IC Loop3     | APLCLMVLAYLQIFQKLWCQQ    |
| Squamata                                   | Iguania       | TM5 – IC Loop3     | YMAPLCLMVLAYLQIFQKLWC    |
| Testudines                                 |               | C – Terminal       | TNMSTLPANG               |
| Testudines                                 |               | IC Loop 3          | PLPSLAQPR                |
| Archosauria - Testudines                   |               | C – Terminal       | ASTESRKSLSLTTQISNFDN     |
| Crocodylomorpha                            |               | N - Terminal       | NWSSIPELNE               |
| Crocodylomorpha                            |               | N - Terminal       | PSTDYDDEEFLRYL           |
| Crocodylomorpha                            |               | IC Loop 3          | IVQRKWKPLQFSAQP          |
| Crocodylomorpha                            |               | C – Terminal       | CGIHQQD                  |
| Aves                                       |               | N- Terminal – TM1  | YEWALIAGYIVVFIVA         |
| Aves - Passeriformes                       |               | C – Terminal       | TSNIDEAM                 |
| Aves - Passeriformes                       | Pipridae      | C – Terminal       | VLNPSKSME                |
| Aves - Passeriformes                       | Pipridae      | C – Terminal       | MTVSAEDTLN               |
| Aves - Passeriformes                       | Pipridae      | C – Terminal       | LAEHVVLTN                |
| Aves - Passeriformes                       | Paridae       | C – Terminal       | LSEQVALSNV               |

514 **Table 2.** Putative signatures motifs and their location along the primary structure of the protein  
 515 for AT/Ox GPCRs in different taxonomic groups. Note that most of the signatures are located at  
 516 the level of the C-terminal domain (29.7%) and the N-terminal domain (21.6%).

517 **LEGENDS FOR THE FIGURES**

518 **Supporting Information file 1.** Complete list of sequences analyzed. The putative signatures  
519 motifs for every group are highlighted.

520 **Figure 1.** Schematic view of a generalized GPCR showing the two highly conserved domains,  
521 and the corresponding consensus after a multiple sequence alignment of sequences pertaining to  
522 the Allatotropin/orexin family of receptors. The alignment includes species pertaining to  
523 Placozoa, Cnidaria, Arthropoda, Mollusca, Annelida, Brachiopoda and Chordata.

524 **Figure 2.** Evolutionary history of the Allatotropin/orexin family of receptors. All the sequences  
525 included present the seven transmembrane domains and the corresponding N-terminal and C-  
526 terminal domains. The tree was inferred by the Neighbor-Joining method. The cut-off value of  
527 replicate trees in which the associated taxa clustered together after a bootstrap test (1000  
528 replicates) was 50%.

529 **Figure 3.** Phylogenetic relationships of Vertebrata. The tree was inferred by the Maximum  
530 Likelihood method. The cut-off value of replicate trees in which the associated taxa clustered  
531 together after a bootstrap test (1000 replicates) was 50%. Note that both kind of orexin receptors  
532 (Type 1 and Type 2) group independently. Type 2 receptor is present in all the groups of  
533 vertebrates included in the analysis. Type 1 receptor is only present in mammals with the  
534 exception of Lepisosteiformes (Actinopterygii: Neopterygii), suggesting that this kind of receptor  
535 could have appeared more than once along the evolution of Vertebrata.

536 **Figure 4.** Maximum Likelihood analysis of Sauropsida. The phylogeny is clearly represented  
537 showing Lepidosauromorpha as the sister group of Archosauria. The main groups of Aves are  
538 also represented. Two orders of Neoaves (Passeriformes and Psittasiformes) are recognized.  
539 Furthermore, in Passeriformes, the best represented group, two families can be recognized by  
540 signature motifs. Testudines appear as the sister group of Archosauria in agreement with the  
541 current accepted hypothesis that recognize them as Diapsida, resembling also the currently  
542 proposed group of Archelosauria.

543 **Figure 5.** Analysis of Maximum Likelihood of sequences of Orexin receptor corresponding to  
544 Actinopterygii. All the species pertain to Neopterygii being represented the two extant groups



545 (Lepisosteiformes and Halecostomi), which appear as the sister group of Chondrichthyes.  
546 Currently proposed groups are clearly represented at higher taxonomic levels. The analysis also  
547 recognizes taxa at lower levels including families defined by characteristic motifs that might be  
548 considered as signatures.

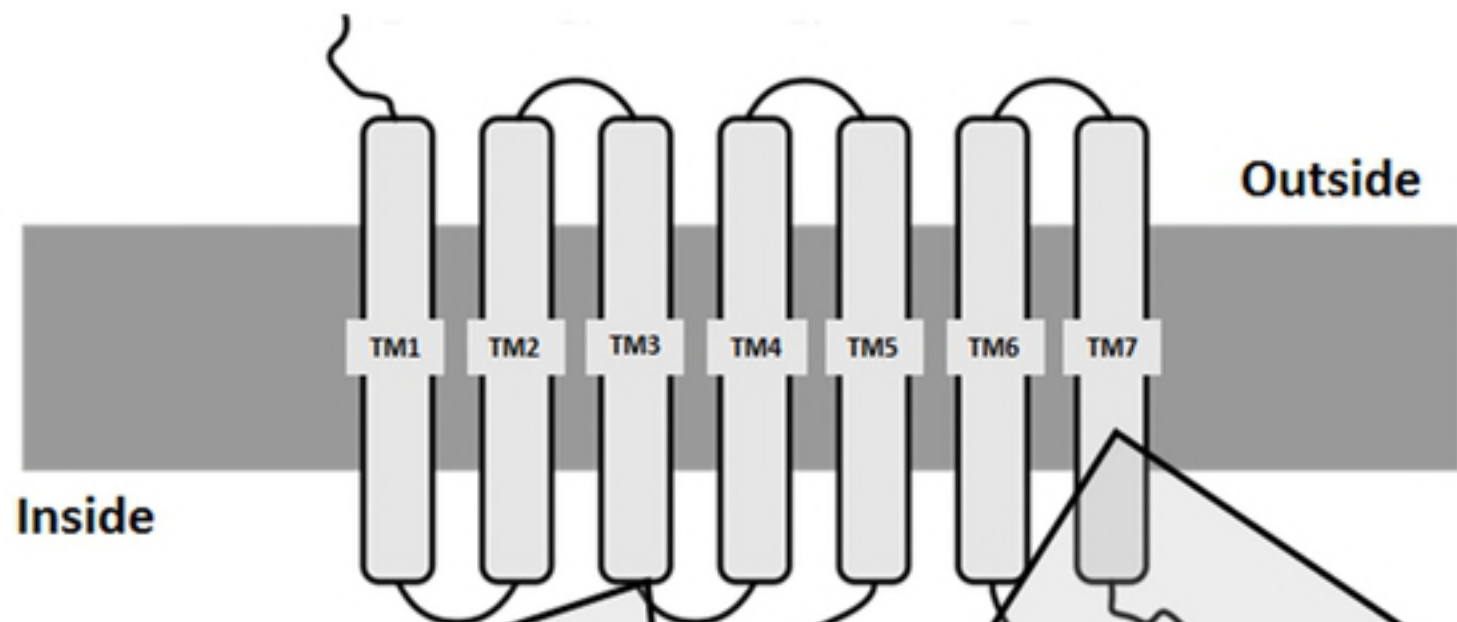

TM3

TM7

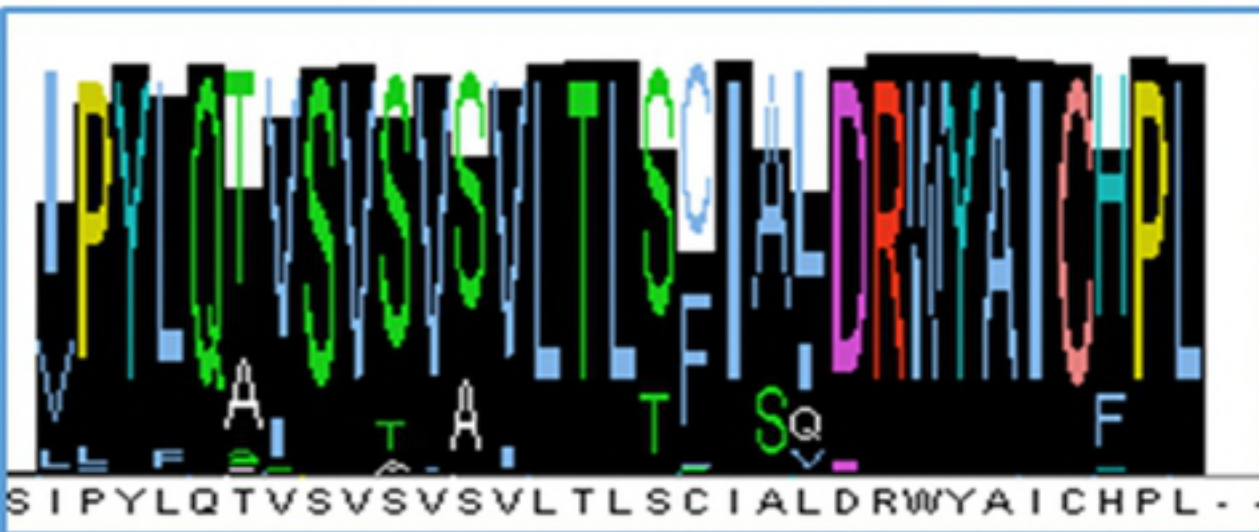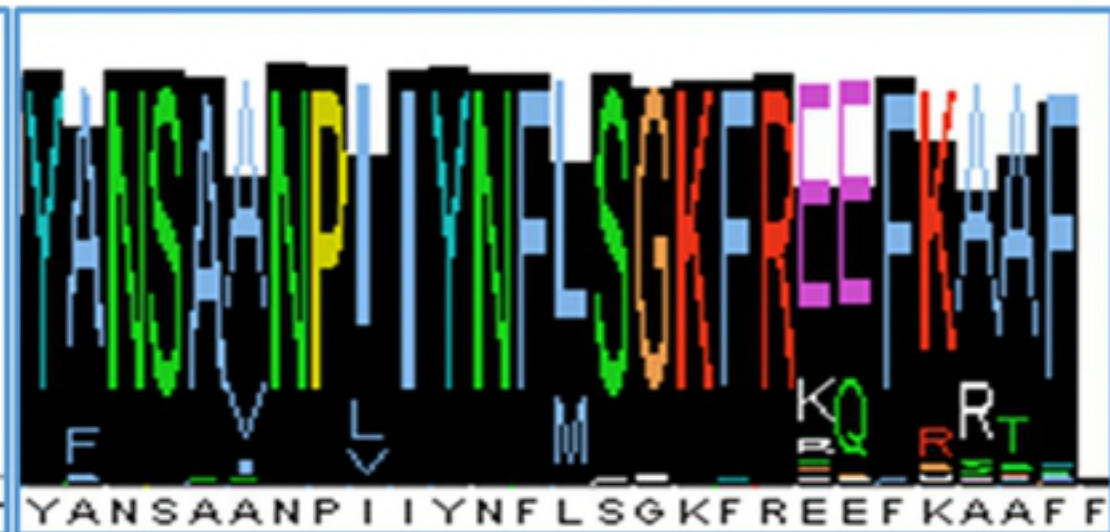

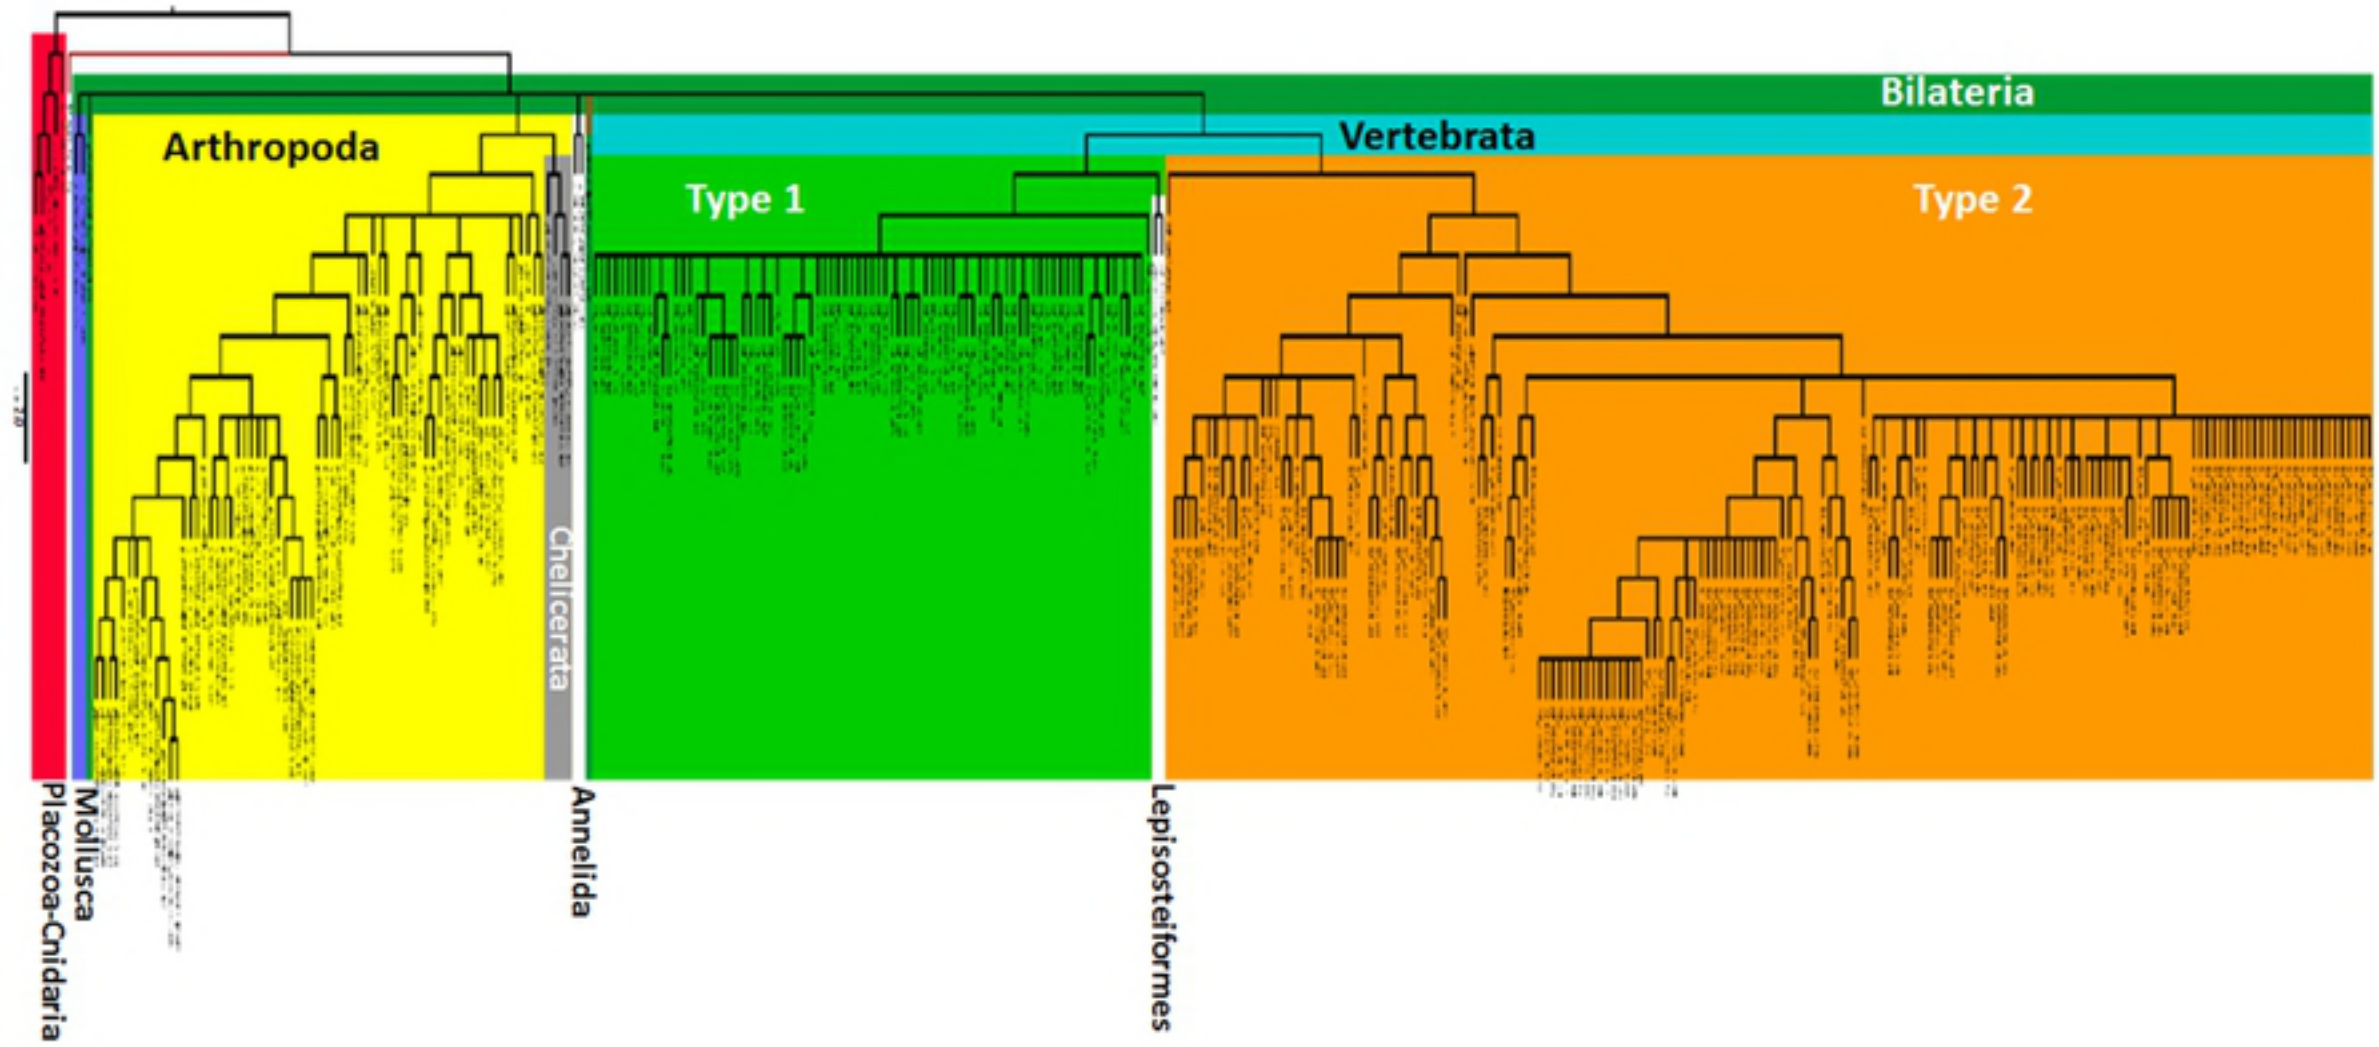

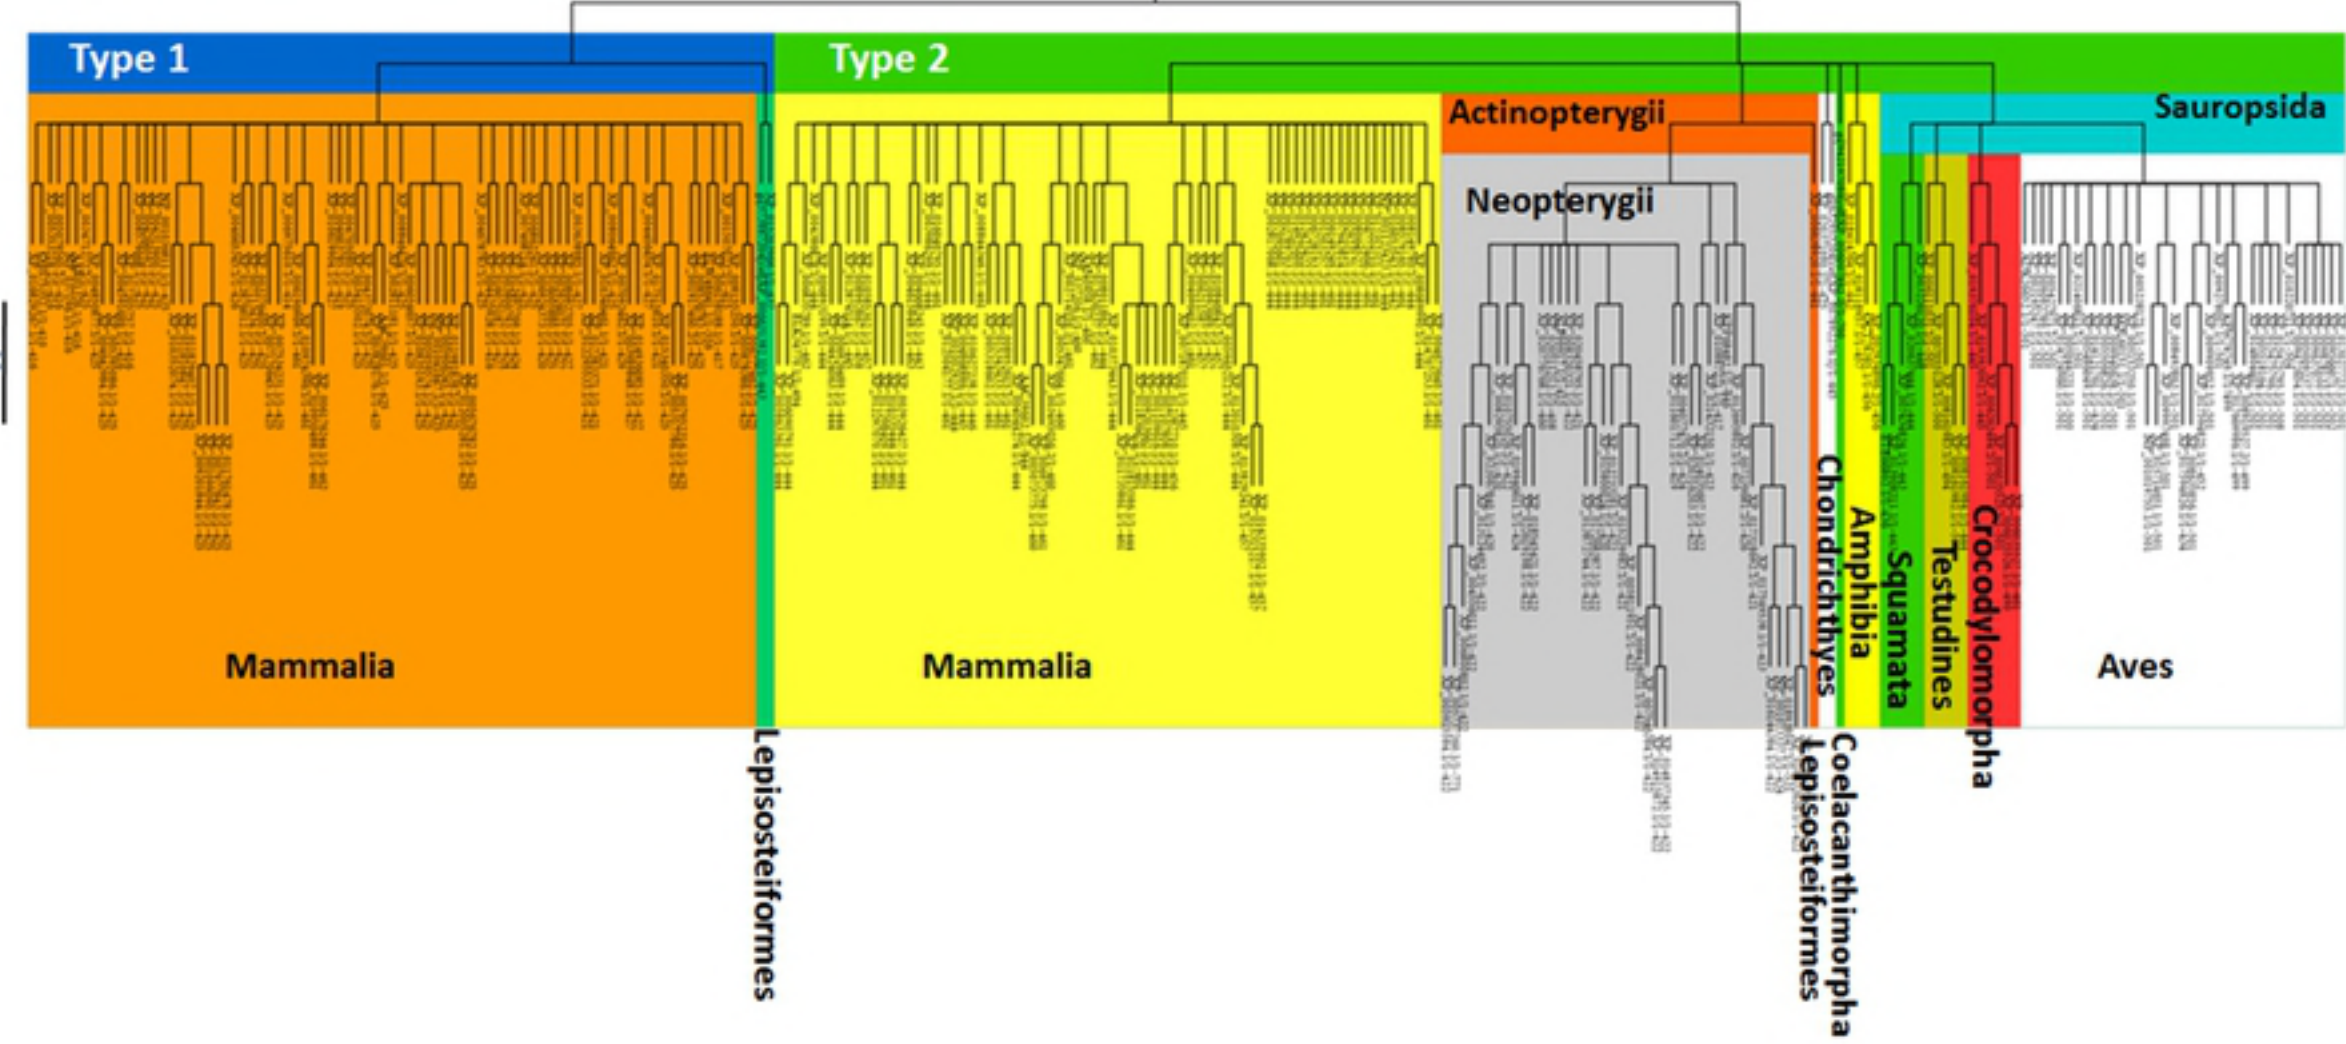

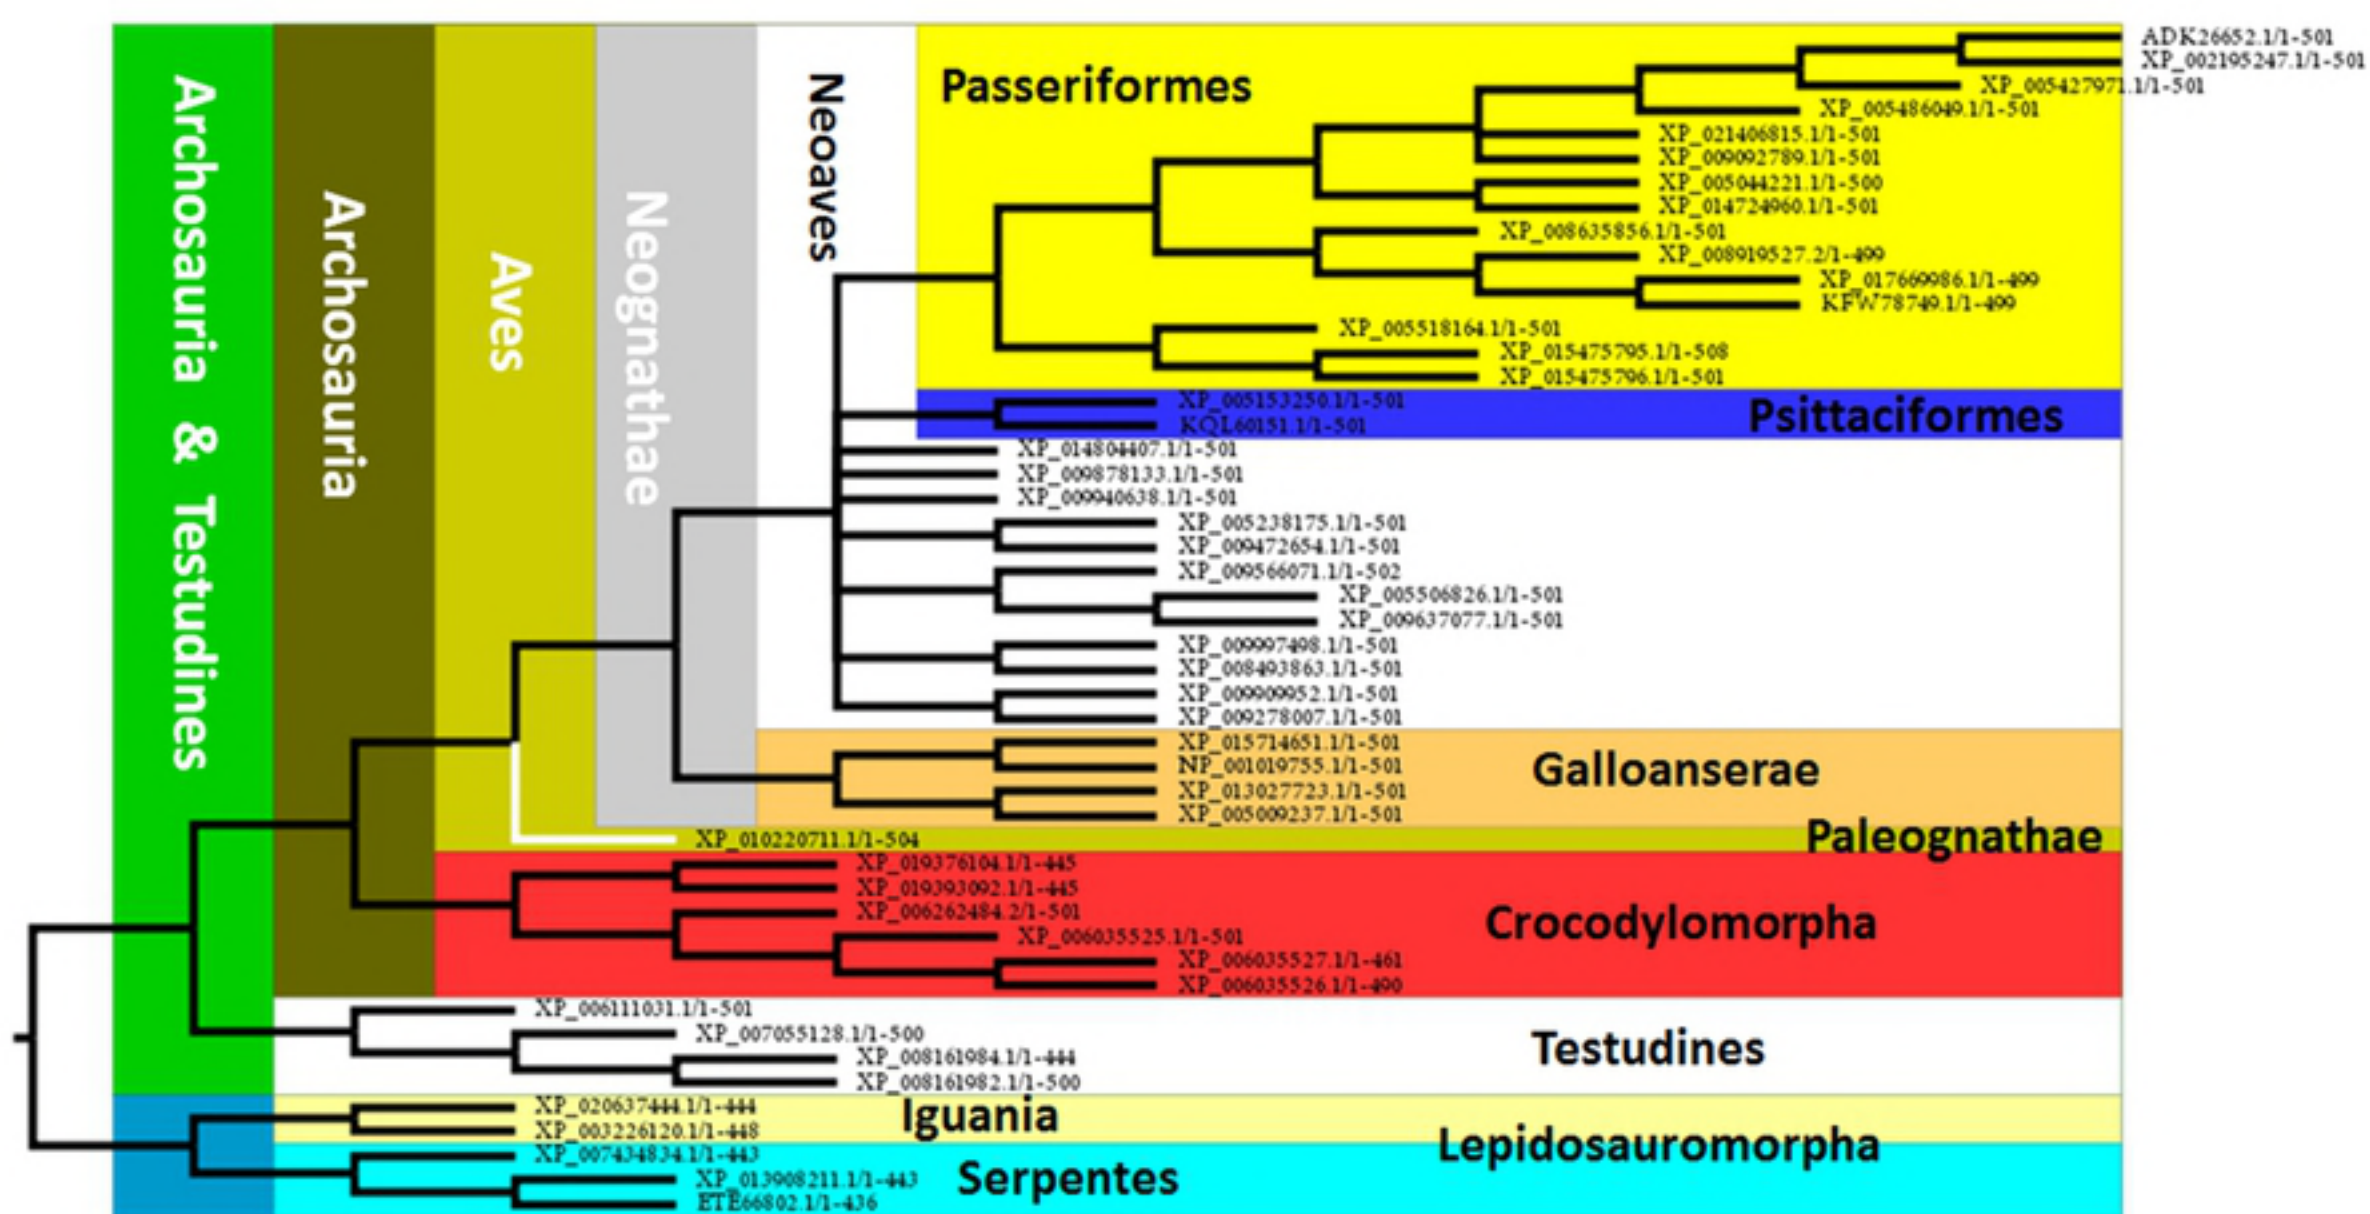

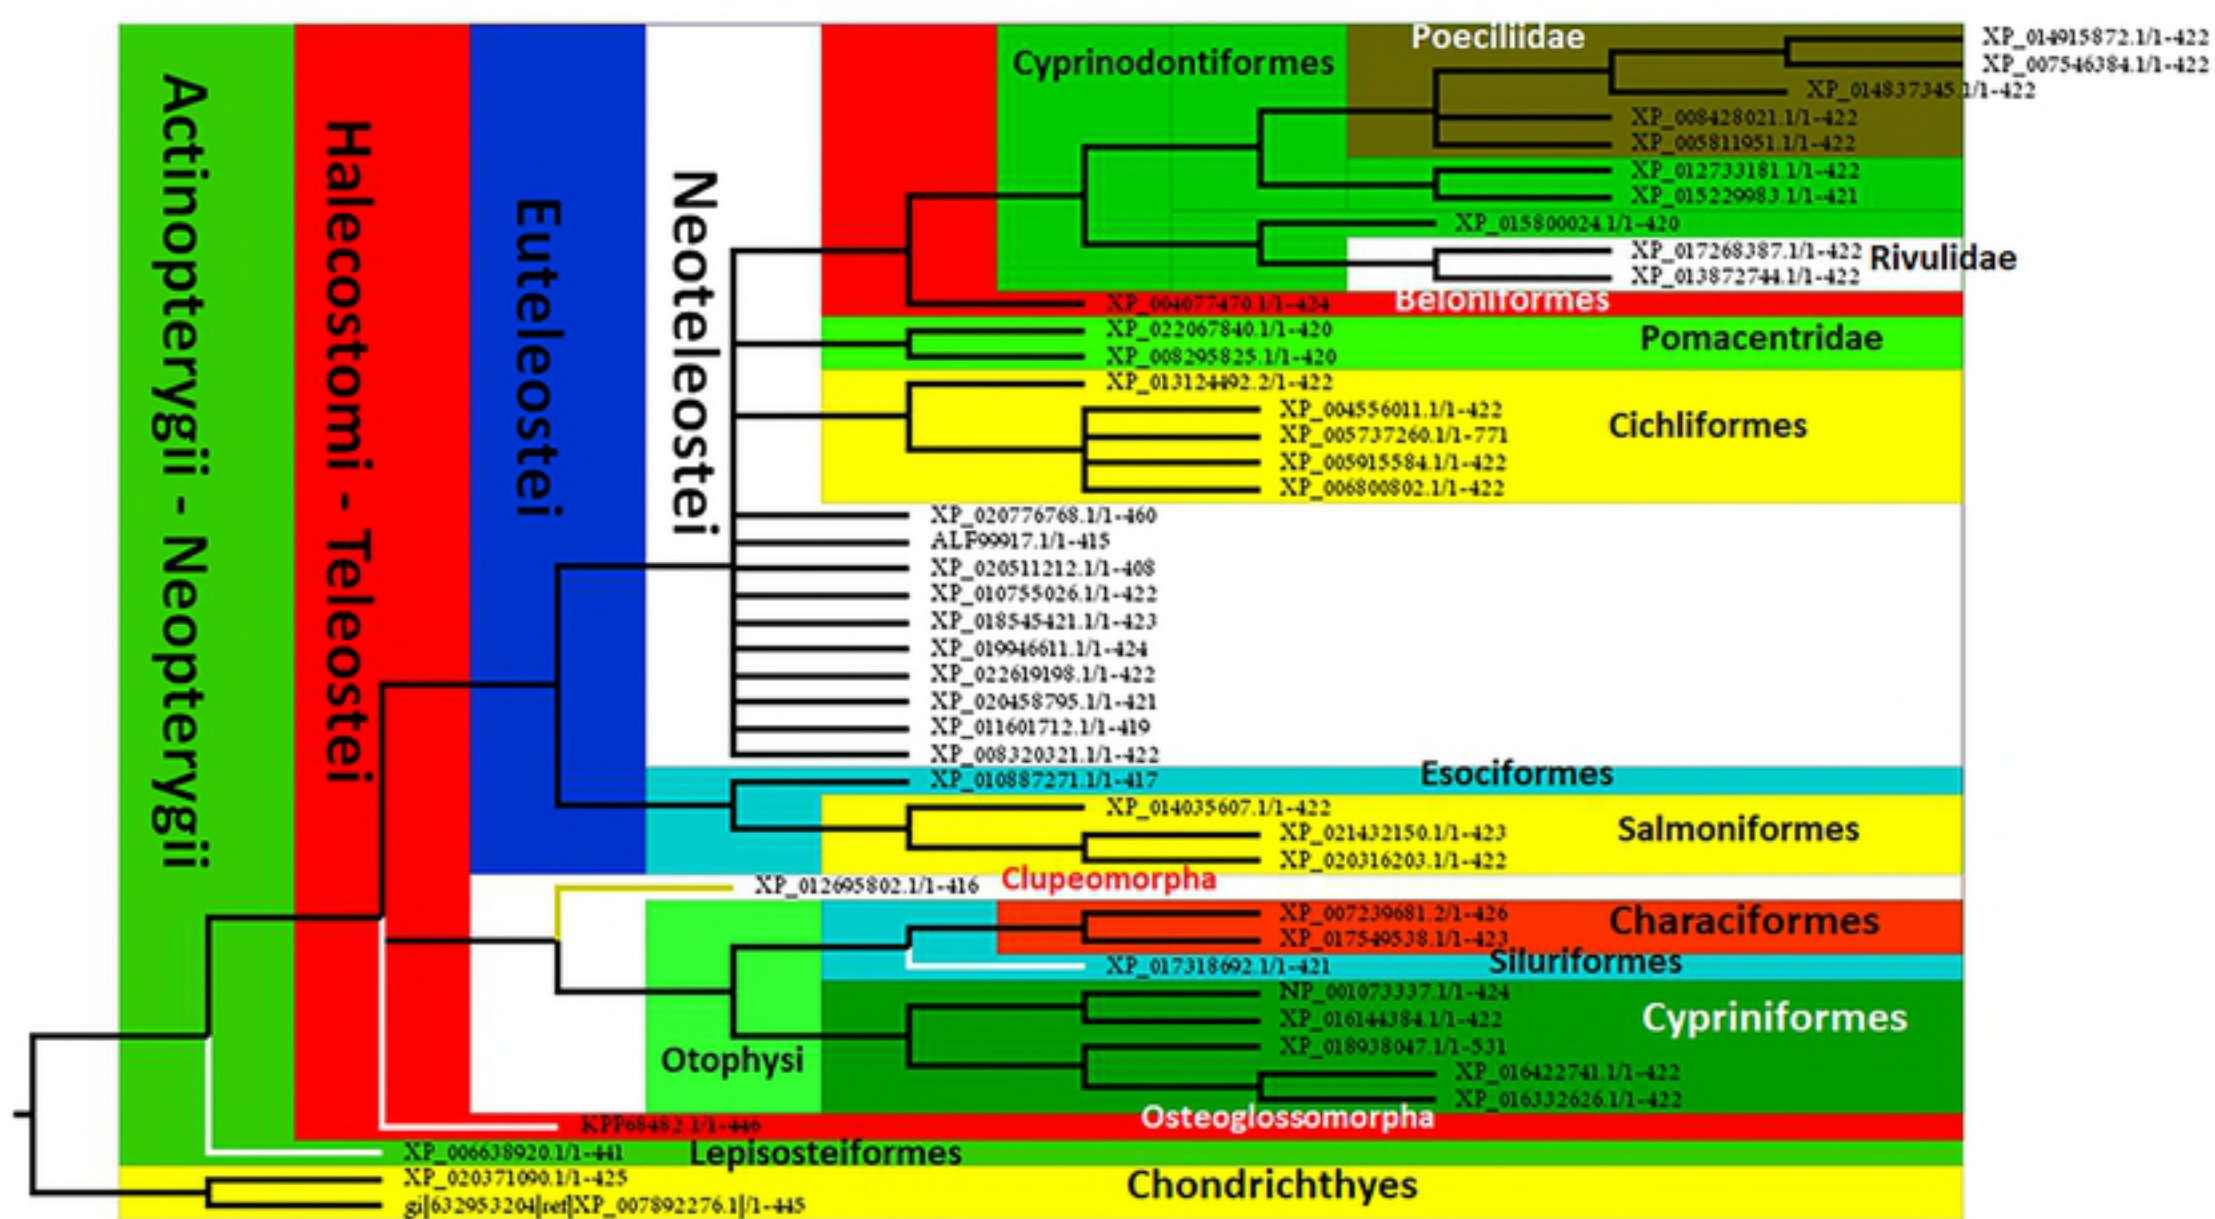

Source: http://biorxiv.org/content/10.1101/403709v1.full.pdf
